# Supplementary material for: VAMP3 and SNAP23 as Potential Targets for Preventing the Disturbed Flow-Accelerated Thrombus Formation
Source: Frontiers journal article supplement (doi:10.3389/fcell.2020.576826), 2020-11-05
Supplement: Image_1.PDF [file Image_1.PDF]

Supplementary materials

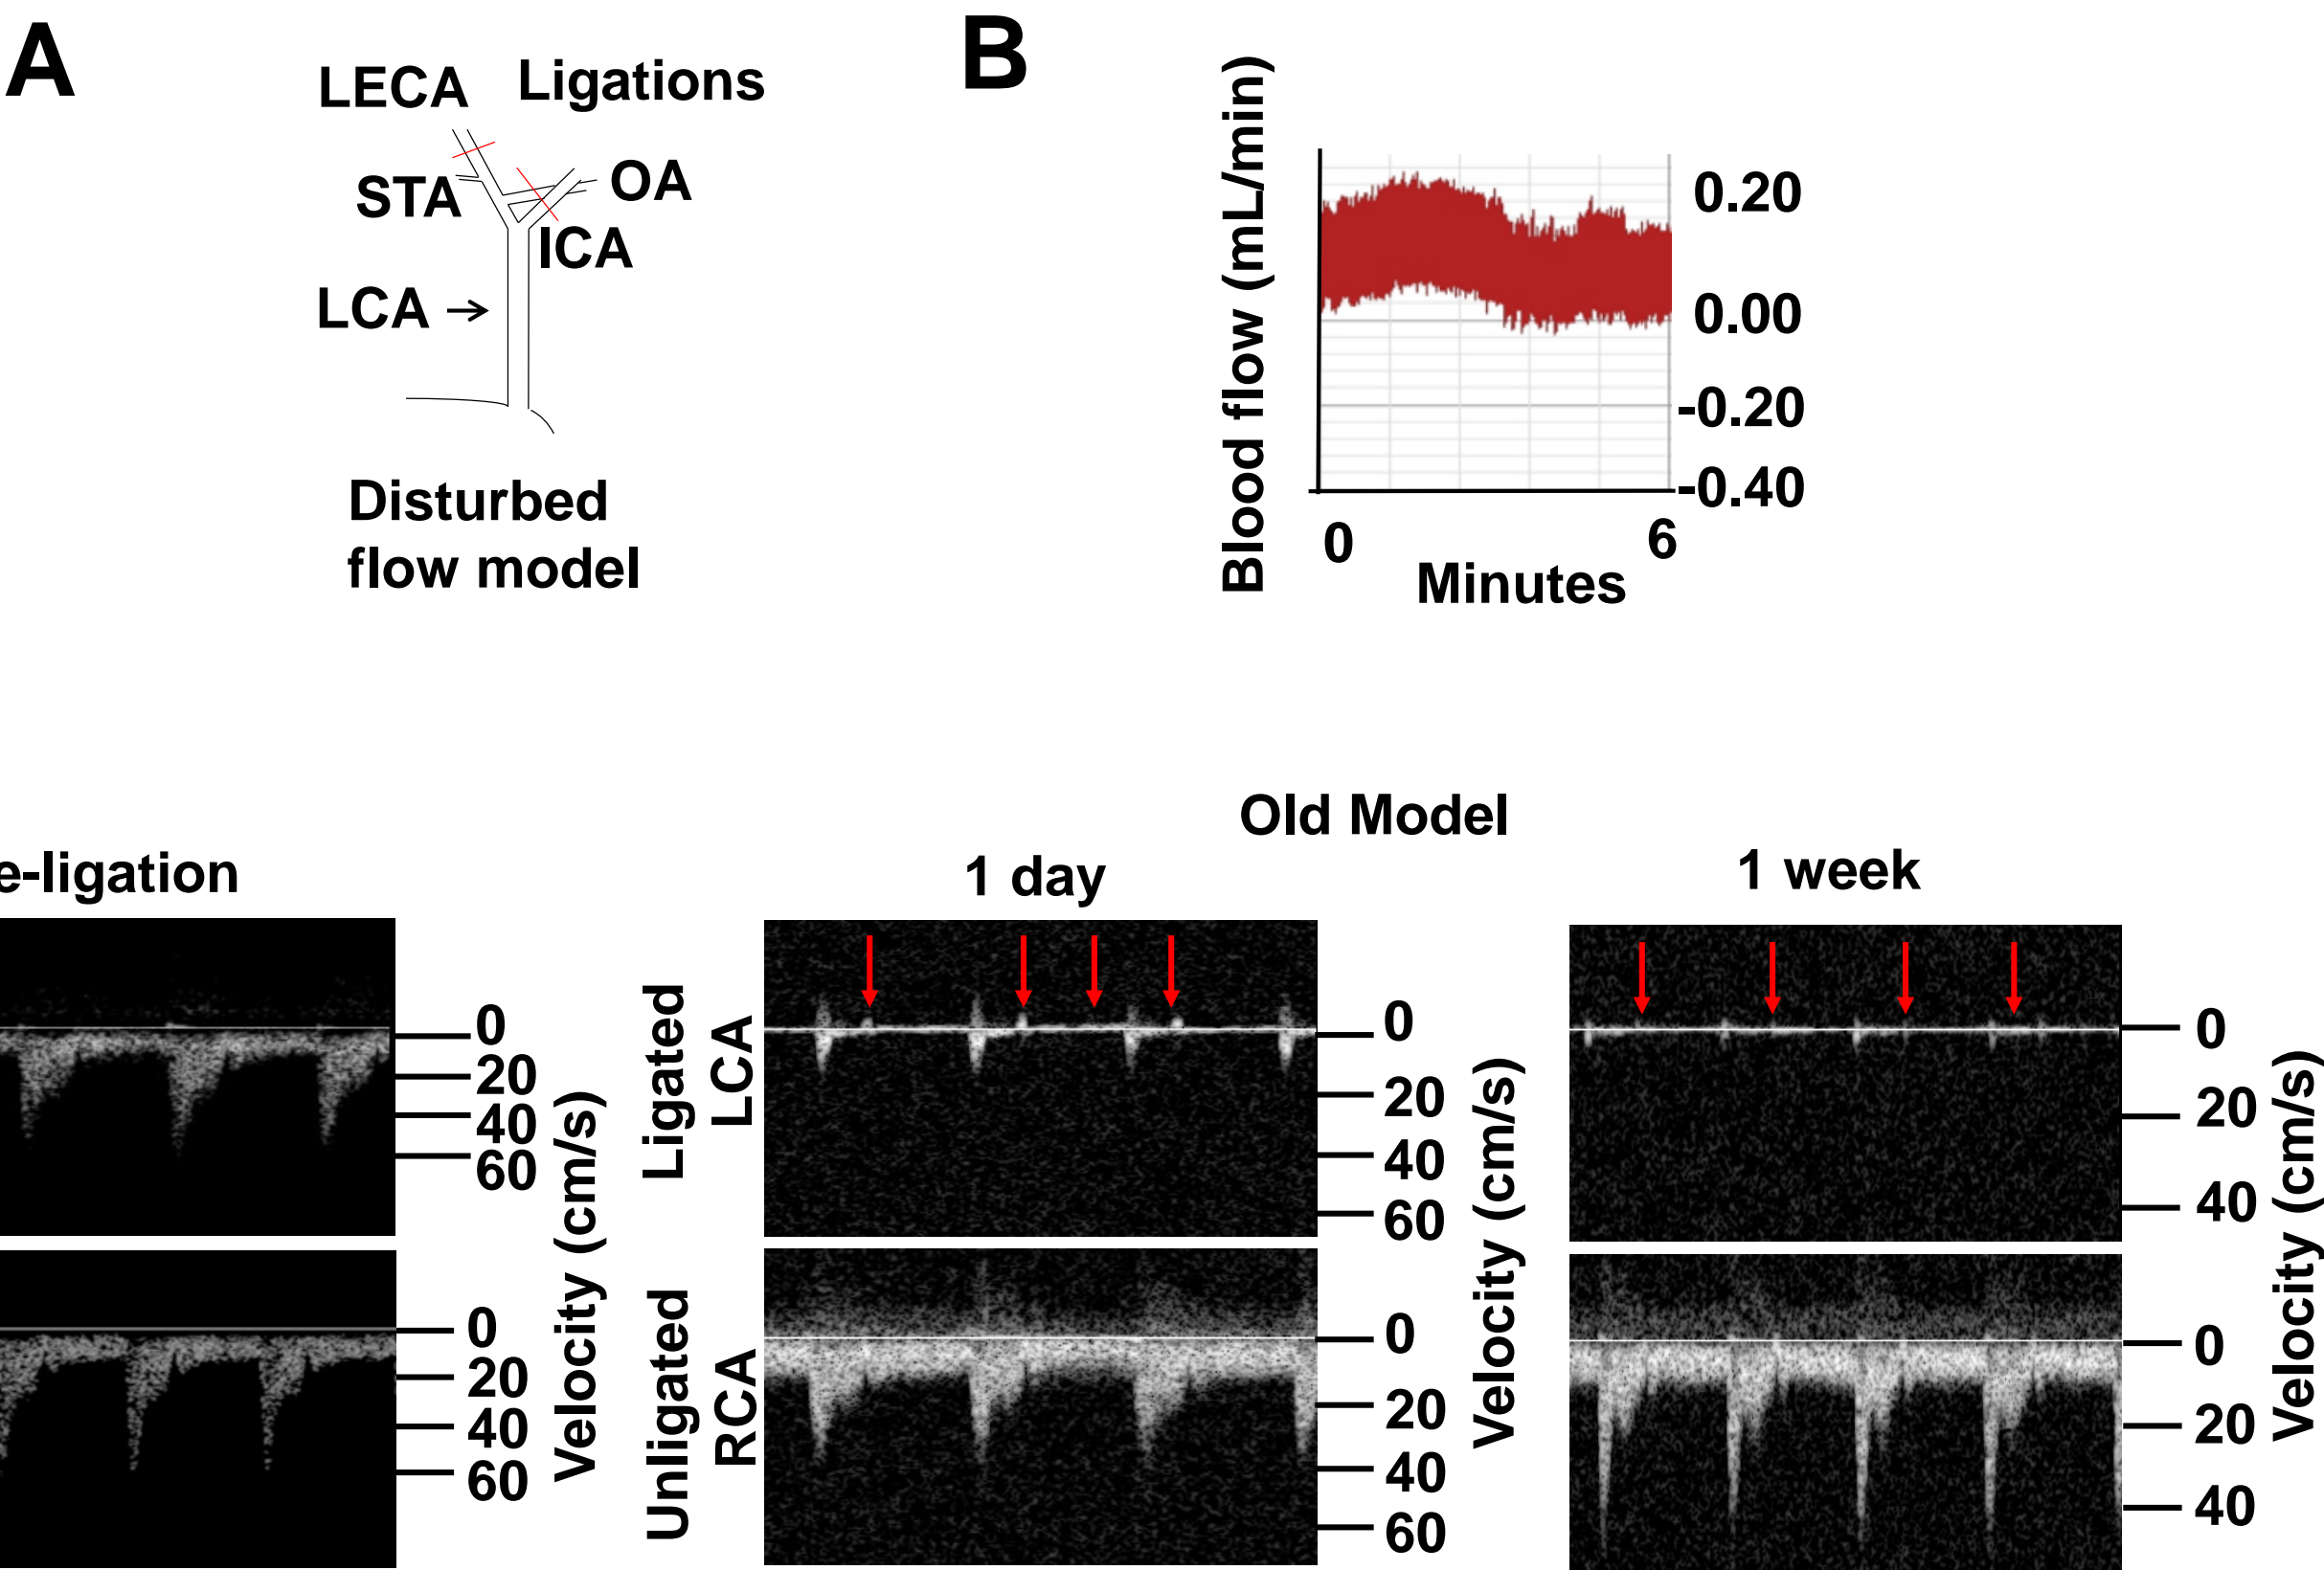

Figure S1. Measurements of blood flow in common carotid arteries in the partial ligation model.

## Supplementary materials

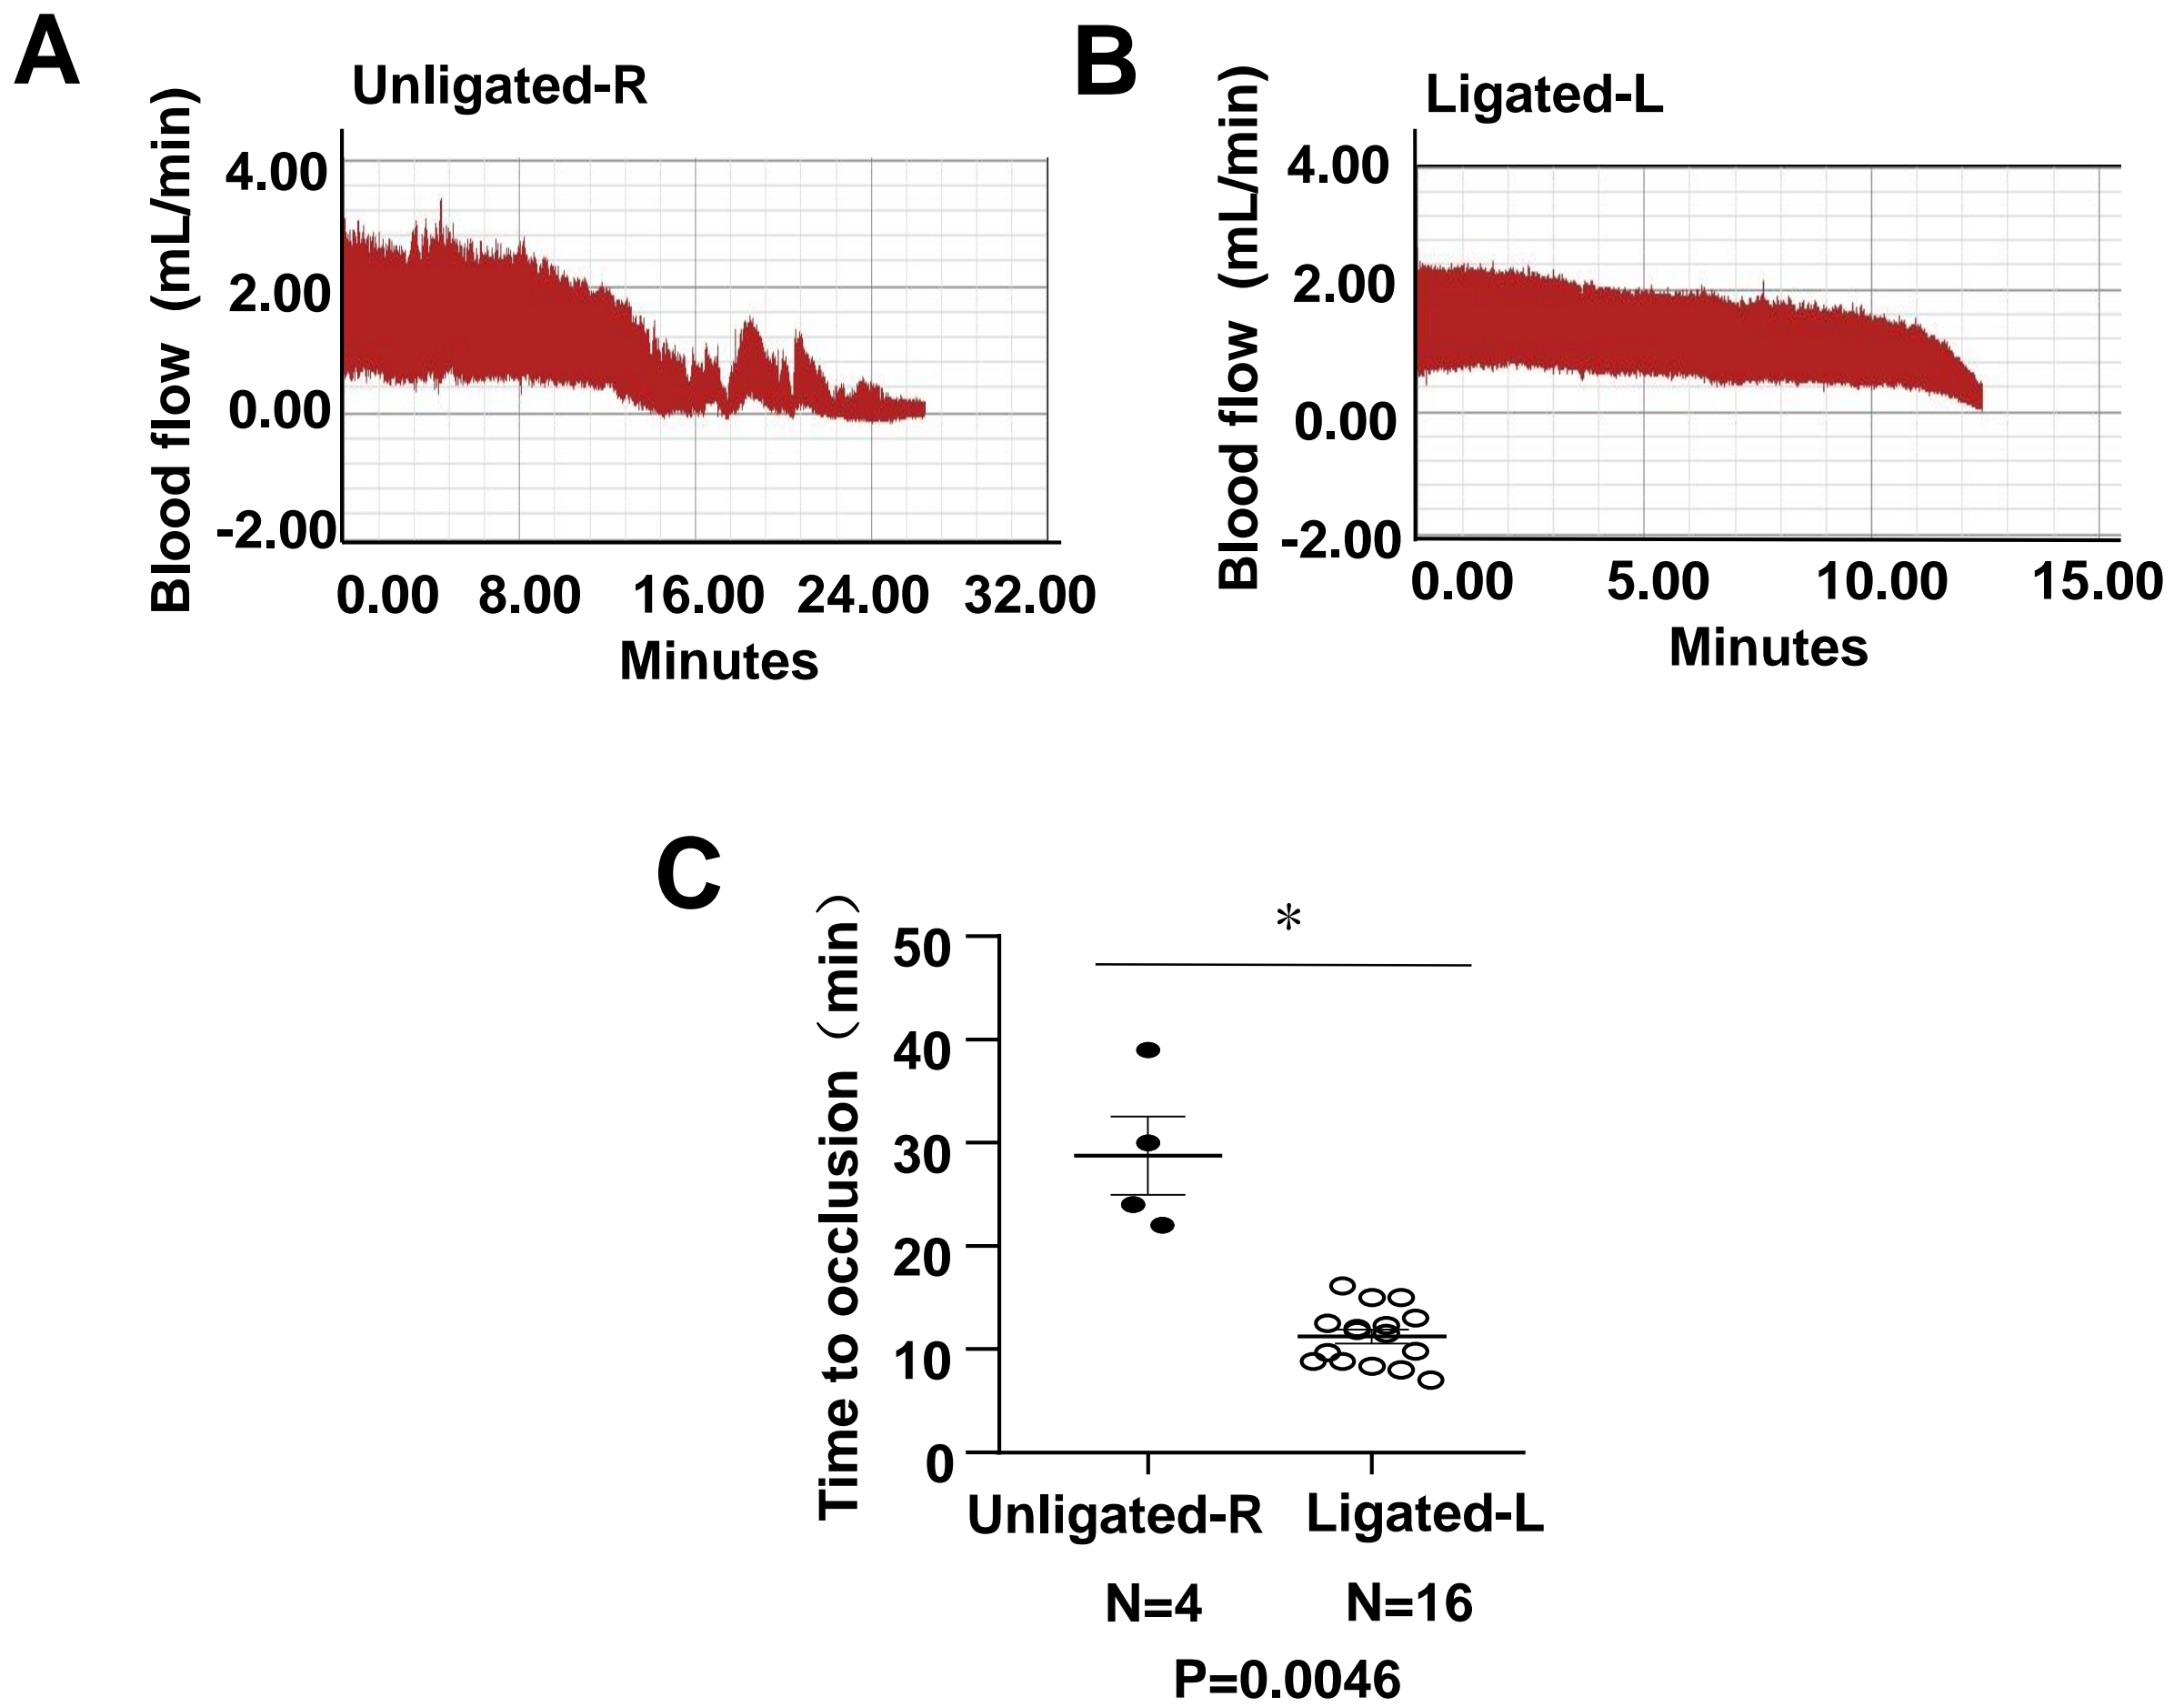

**Figure S2. Ligation of LECA significantly reduces the average time to occlusion.**

## Supplementary materials

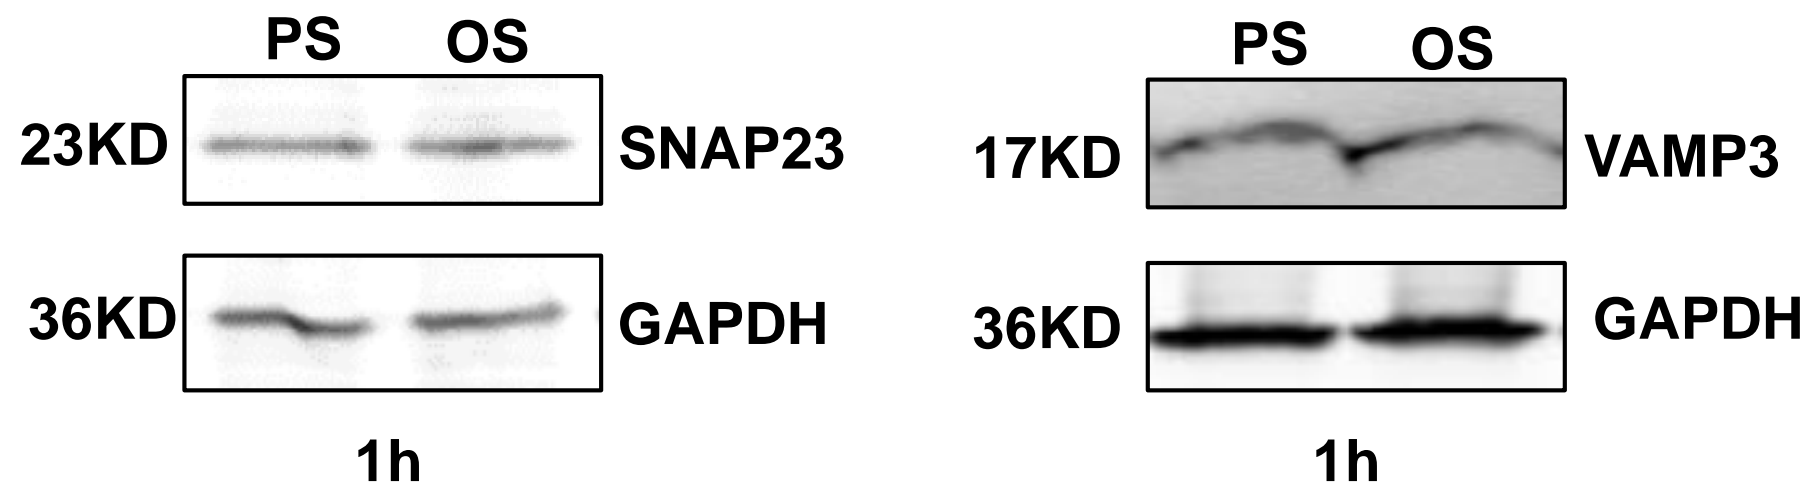

**Figure S3. Influences of shear stress on the expressions of SNAP23 and VAMP3 in endothelial cells.**

## Supplementary materials

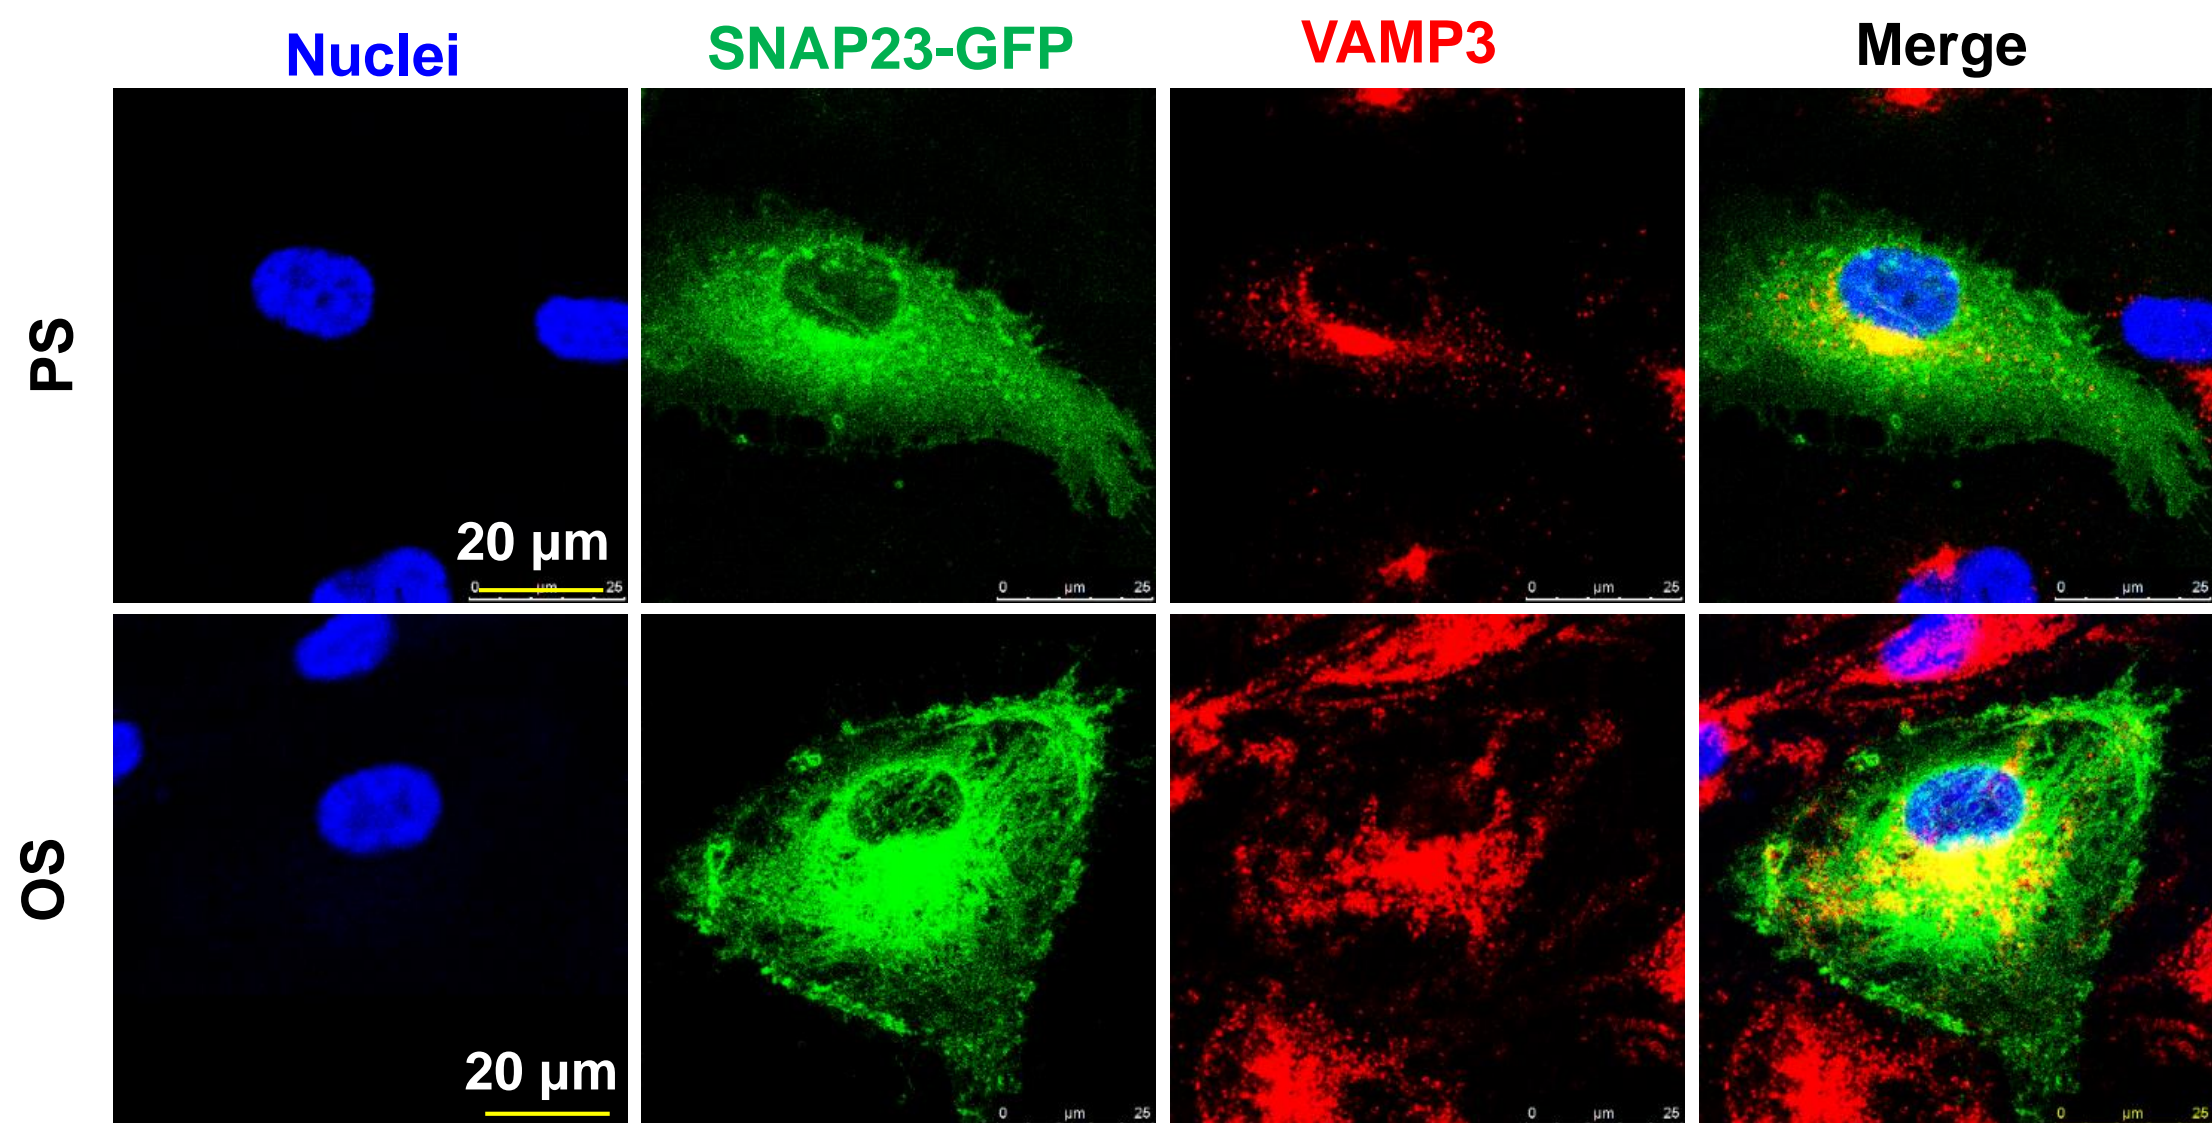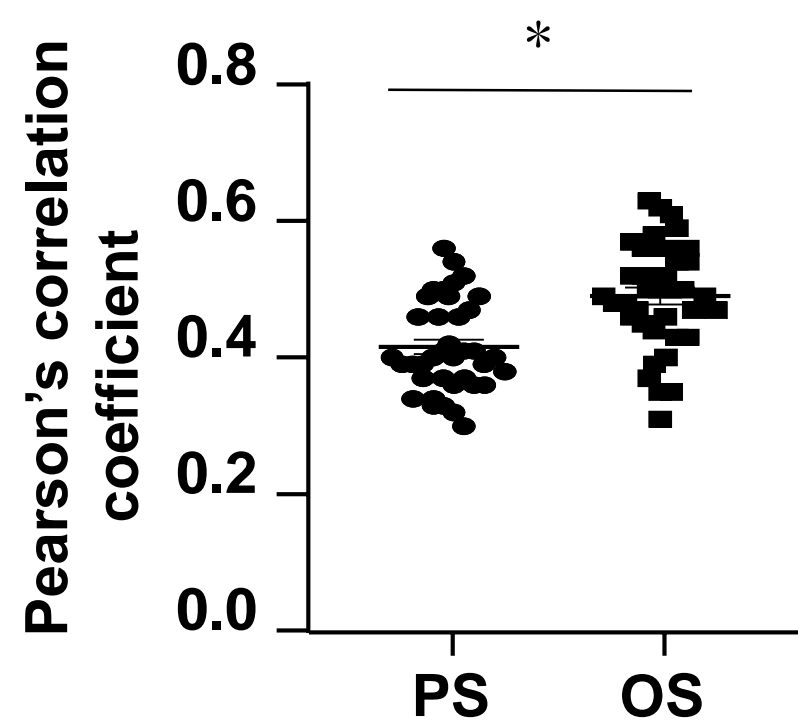

**Figure S4. Oscillatory shear stress enhances the colocalization of SNAP23 and VAMP3.**

Supplementary materials

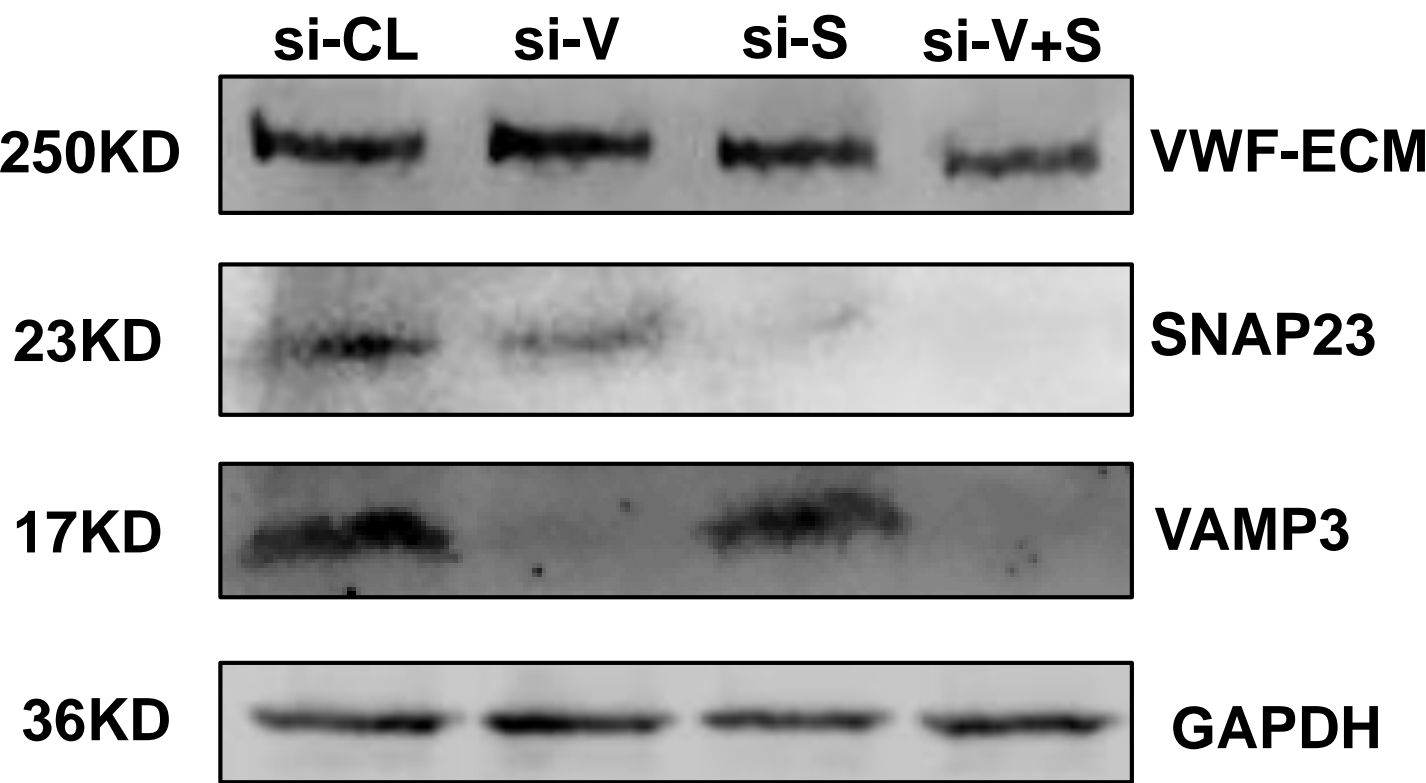

Figure S5. Knockdown of VAMP3 and SNAP23 inhibits VWF secretion.



## Supplementary materials

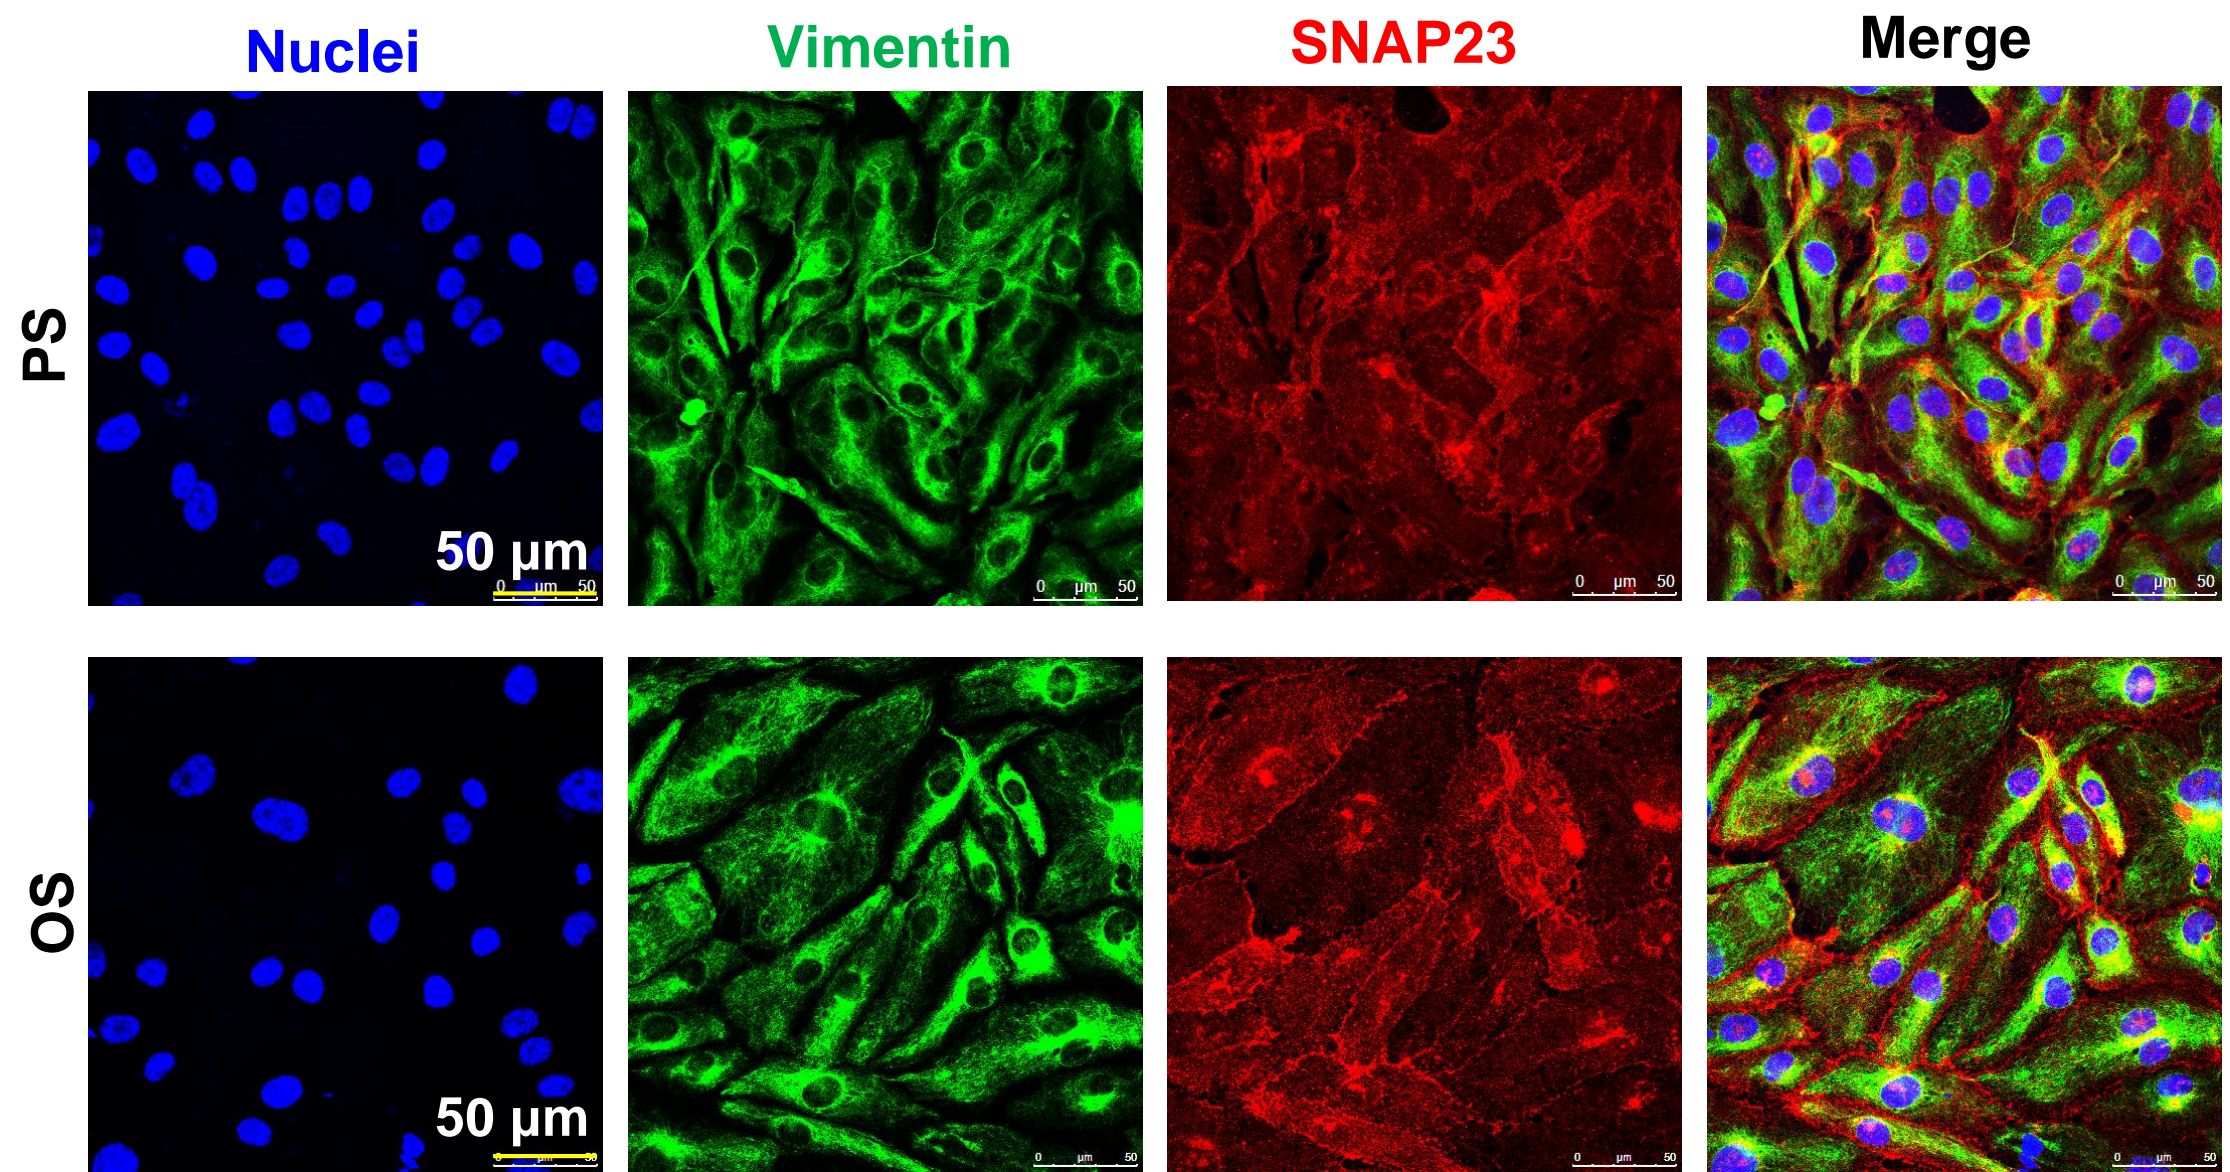

**Figure S6. Effect of PS or OS on colocalization of SNAP23 and vimentin in endothelial cells.**



## Supplementary materials

**A**

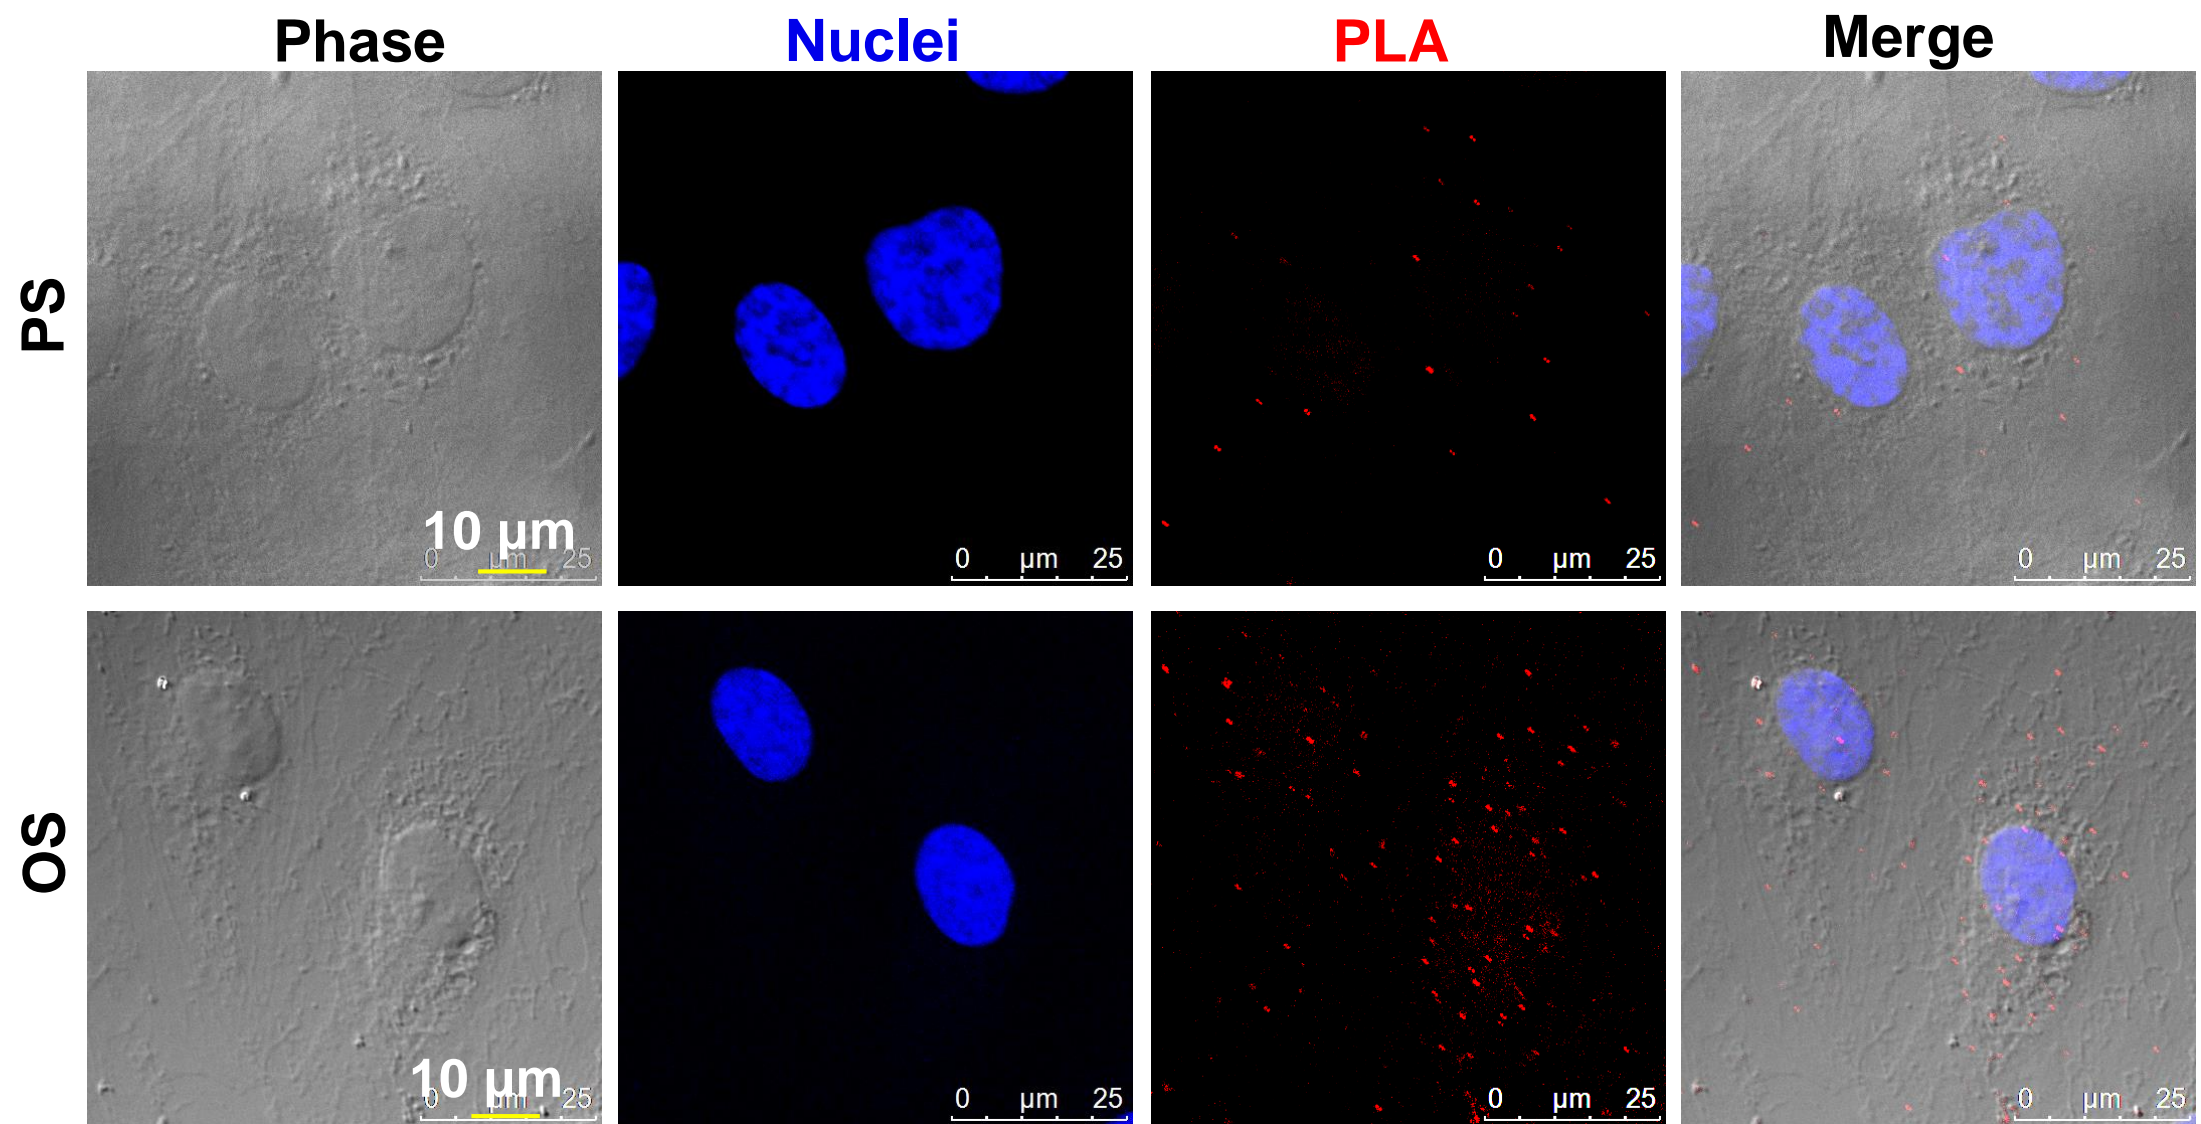

# B

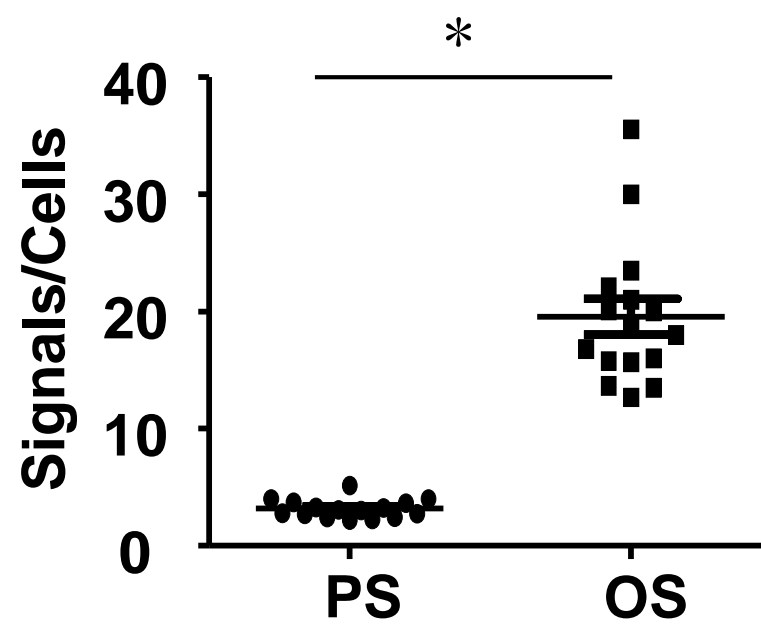

**Figure S7. Oscillatory shear stress promotes the association of SNAP23 and vimentin in endothelial cells.**



## Supplementary materials

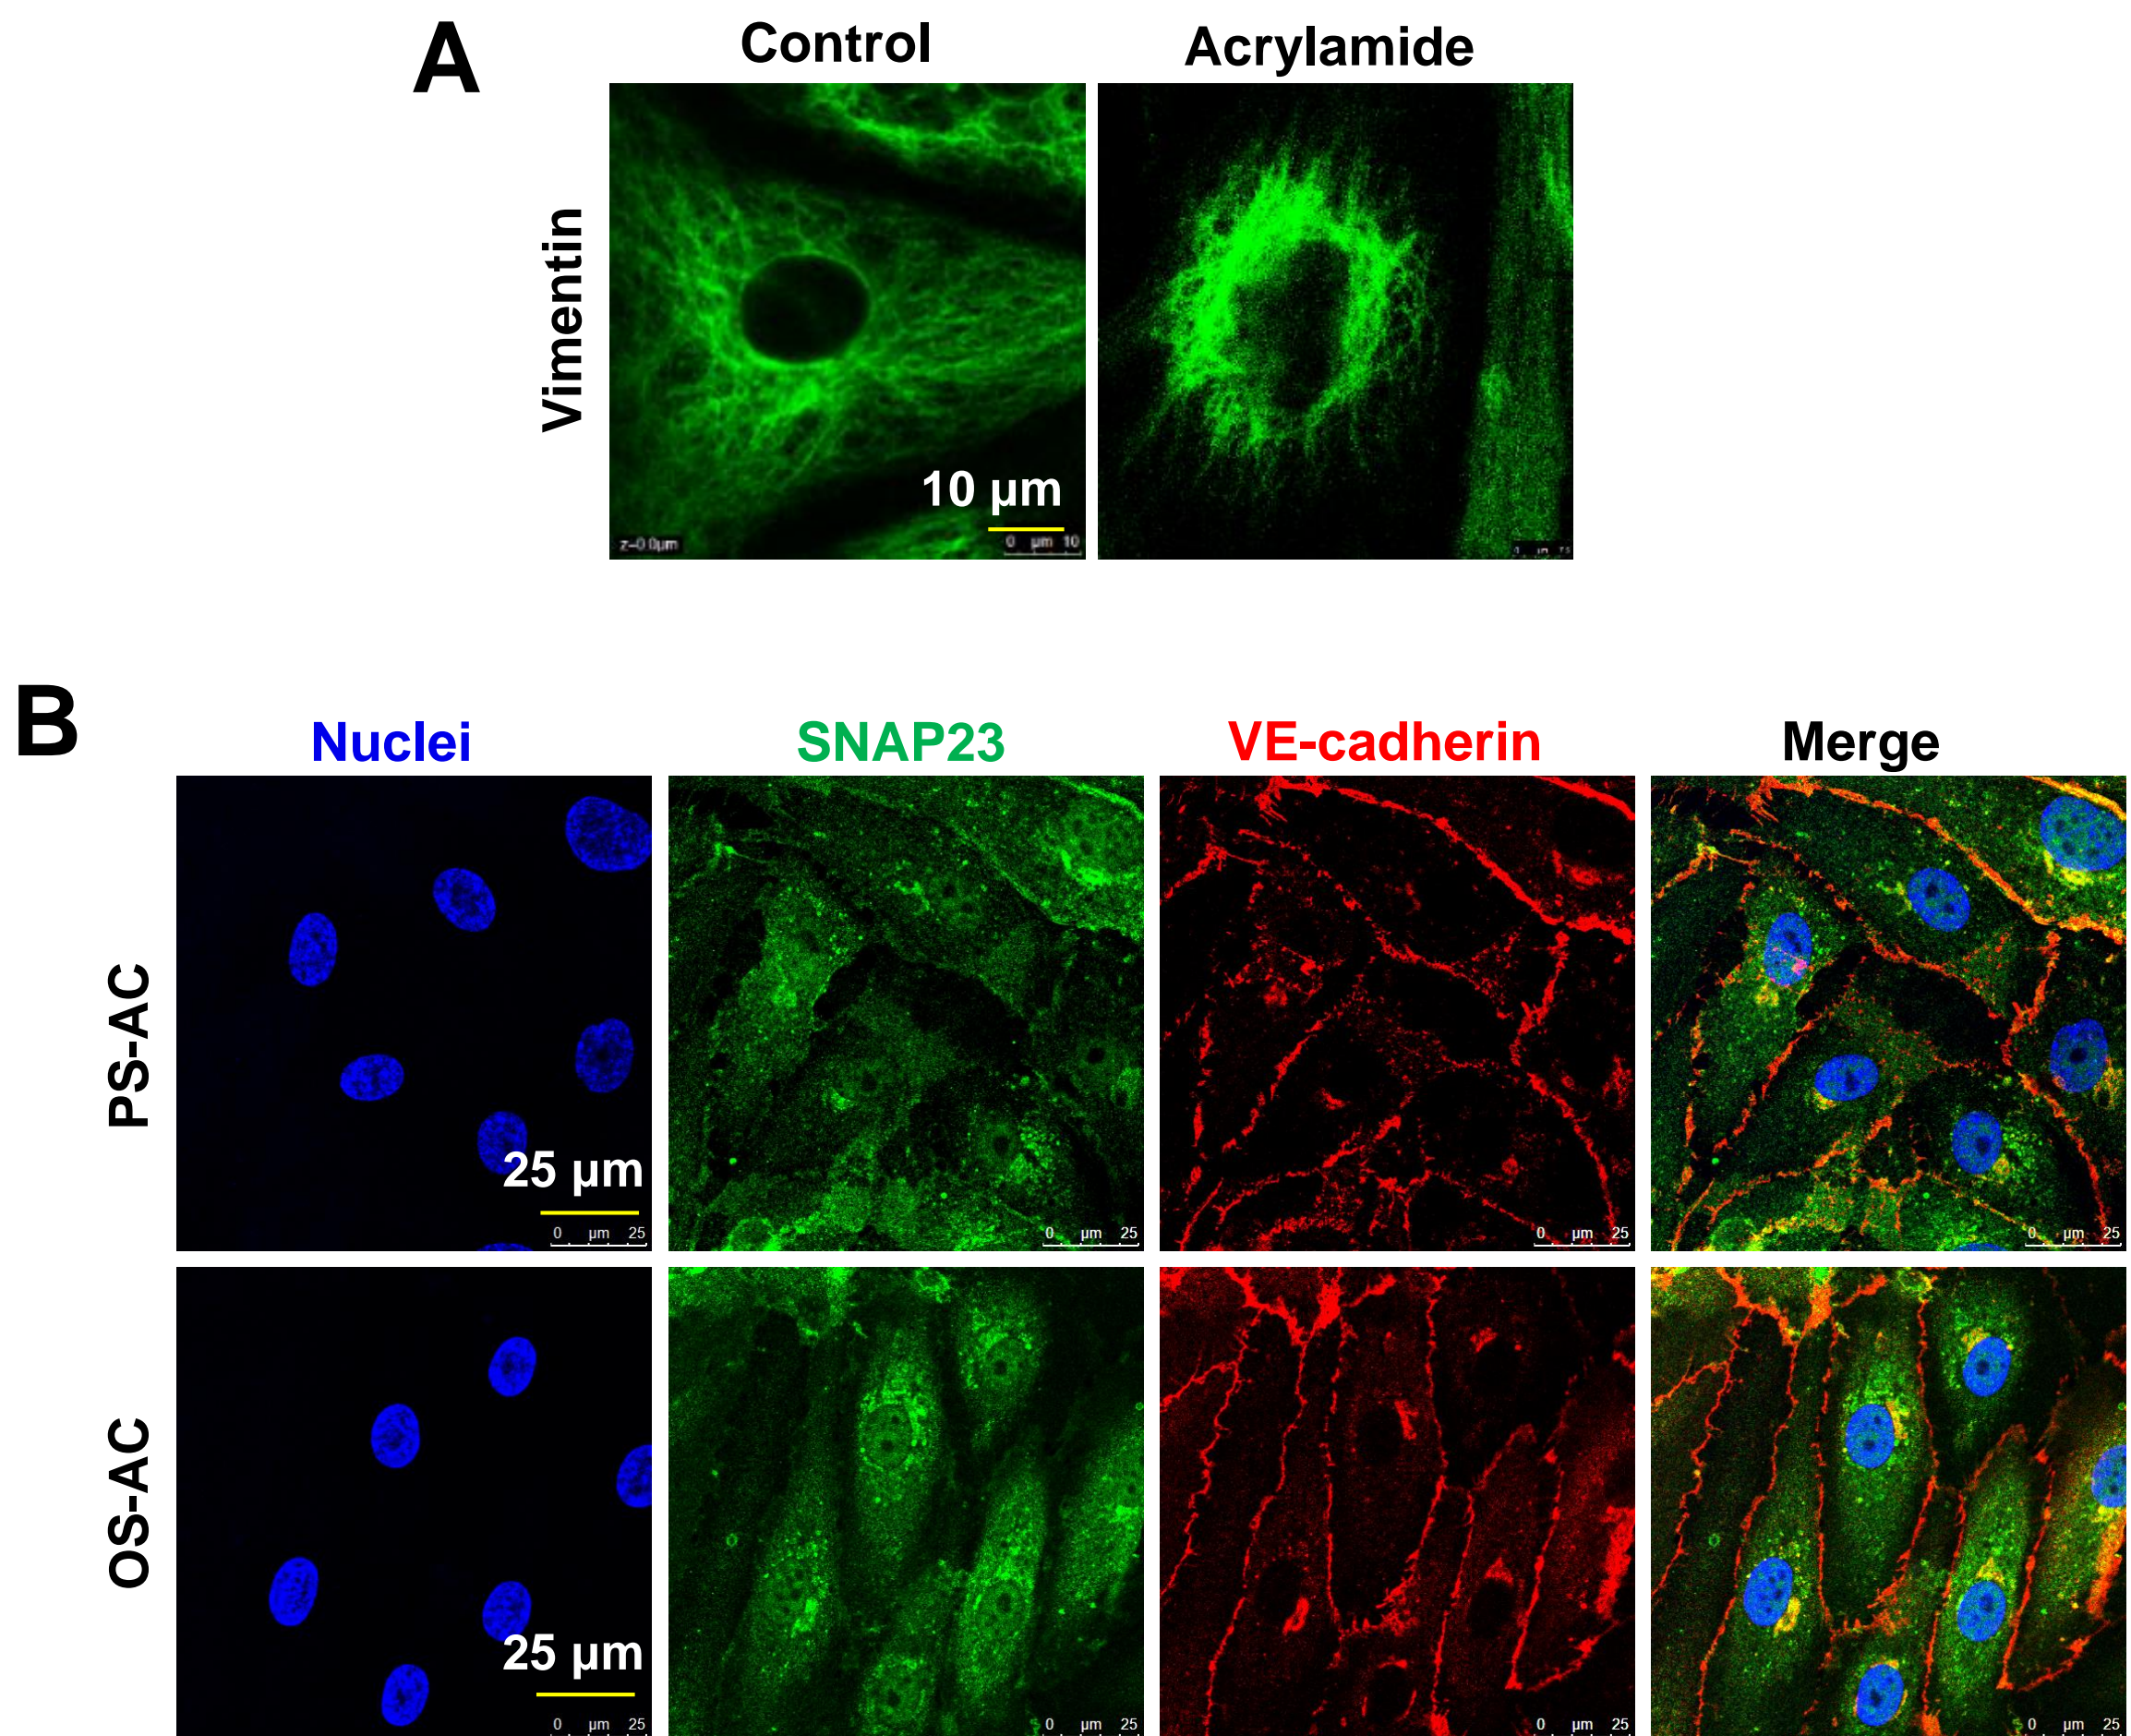

**Figure S8. Treatment with acrylamide disrupts the organization of vimentin intermediate filaments as well as the cell membrane localization of SNAP23 both in static and the sheared endothelial cells.**
